# Supplementary material
Source: ML conference proceedings conference paper supplement (https://proceedings.neurips.cc/paper_files/paper/2020/hash/310614fca8fb8e5491295336298c340f-Abstract.html)
Supplement: Supplementary file [file 310614fca8fb8e5491295336298c340f-Supplemental.pdf]

---

# Supplementary Material: Temporal Positive-unlabeled Learning for Automatic Biomedical Hypothesis Generation

---

Anonymous Author(s)

Affiliation

Address

email

## 1 Data Preparation

### 2 1.1 Graph Construction

3 Given a dataset of scholarly publications (e.g., from PubMed), we extract and categorize the terms  
4 in the documents defined on a set of UMLS [18] and MeSH [1] terms. In this study, we use data  
5 from the pubmed database of March 2019 and Semantic scholar COVID-19 dataset [2] collected in  
6 March 2020. Each UMLS term belongs to one of three categories, namely: 1) *Genes*, 2) *Chemicals*,  
7 and 3) *Diseases*. We construct a network  $G = \{V, E\}$ , where  $V$  is the set of nodes corresponding  
8 to the biomedical terms. The relationship  $E$  represents the close co-occurrence of the two terms  
9 in literature. To be specific, an edge in  $E$  connects two nodes if the two corresponding terms are  
10 mentioned together in the same title, abstract, or paragraph of a paper<sup>1</sup>.

11 Next, we split the obtained network using year windows, thereby, obtaining a sequence of temporal  
12 graphlets  $G = \{G^1, G^2, \dots, G^T\}$ . As defined in the Introduction Section 1 of the main paper, this  
13 graphlet sequence encapsulates the temporal evolution of node pair relationships. Since the node  
14 terms belong to several categories (e.g., drugs and diseases), the graph  $G^t = \{V^t, E^t, x^t\}$  is, in fact,  
15 a dynamic heterogeneous attributed graph, with incremental nodes  $V^1 \subseteq V^2, \dots, \subseteq V^T$  and edges  
16  $E^1 \subseteq E^2, \dots, \subseteq E^T$ . The node attribute  $x^t$  is composed of the term description when available, and  
17 the term contexts, which are the aggregation of sentences encompassing the mention of the terms in  
18 the documents. We use the texts from the publication titles, abstracts, and full-text paragraphs when  
19 available. The node attributes vary per time window due to the increase in the number of publications.

### 20 1.2 Positive Samples Construction

21 For each time step  $t$ , we construct only the node pairs of positive samples, since the negative pairs  
22 are uncertain. The positive node pairs are identified based on the graph observed at the next time  
23 step. Denote  $a^{ij} = \langle v_i, v_j \rangle$  a node pair consisting of nodes  $v_i$  and  $v_j$ . As shown in Figure 1 of this  
24 supplementary document, the node pair  $a^{ij}$  at time step  $t$  is assigned a positive class +1 if a connection  
25 between node  $v_i$  and  $v_j$  is observed in graph  $G^{t+1}$  (i.e.,  $s_t^{ij} = +1 \iff e(v_i, v_j) \in E^{t+1}$ ).  
26 Otherwise, the node pair  $a^{ij}$  remains as unlabeled.

27 Since we consider the insertion only graphlets sequence, the graph size of the graphlets grows  
28 proportionally with the increase in time step. Therefore, the use of all possible pairs for training  
29 becomes more computationally expensive and less feasible in application. In this study for large  
30 graphs, the notion of a node pair set is defined as a sampled subset of all possible node pairs. This  
31 sample is drawn uniformly for each time step  $t$ .

---

<sup>1</sup>A mention can have a positive or negative connotation. We consider any kind of mention as a relationship, regardless of positive or negative. We leave the study of edge polarity for future investigation.

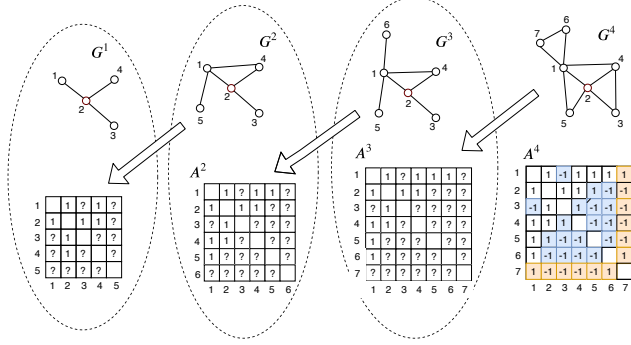

Figure 1: An illustration of the graph sequence  $G = \{G^1, G^2, \dots, G^T\}$  with the sequential positive-unlabeled supervision in  $A = \{A^1, A^2, \dots, A^T\}$  ( $T=4$  here). As the graph grows with more nodes and more connections,  $A^t$  is constructed from the graph  $G^{t+1}$ . One unit at  $i, j$  of  $A^t$  is filled by 1 (a positive relation) if node  $i$  and  $j$  are connected in  $G^{t+1}$ . The unit is filled by a 0 (an unknown relation) if node  $i$  and  $j$  are NOT connected in  $G^{t+1}$ . During training, since we do not observe the future, the node pairs in  $A^T$  are equivalent to those in  $A^{T-1}$ . The difference between them in the colored units are only observed in testing. In the training process,  $G^t$  and  $A^t$  ( $t = 1 \dots T$ ) form training samples of node pairs with positive or unknown labels. When testing, we aim to predict the unobserved pair relationships (colored tiles), in  $A^T$ .

## 32 2 Neighborhood Aggregation

33 The neighborhood aggregation is handled by the aggregator network  $f_G(\cdot; \theta_G)$ . This network uses  
 34 GraphSAGE at its core to aggregate each node’s information in a given node pair  $a^{ij} = \langle v_i, v_j \rangle$  to  
 35 obtain a concise representation for them. For each node  $v$  in the pair, the aggregation network takes  
 36 as input the current node feature  $x_v^t$  as well as the neighborhood information, which includes the  
 37 node features of the sampled node neighbors  $x_{Nr(v)}^t$ . Given a maximum neighborhood layer  $M$   
 38 to consider for information aggregation; at each aggregation step  $m$ , the representation vectors of  
 39 neighbors  $\{\Gamma_u^{m-1}, \forall u \in Nr(v)\}$  at iteration  $m-1$  are aggregated into a single vector  $\Gamma_v^m$  at iteration  
 40  $m$ . Several aggregation techniques for the neighborhood aggregation are proposed in [14]. At the  
 41 initial aggregation step  $m=0$ , node vector  $\Gamma_v^0$  is the input node attribute (i.e.,  $\Gamma_v^0 = x_v^t$ ). After the  
 42 neighborhood aggregation steps, the final representation  $z_v^t = \Gamma_v^M$ . The performance of aggregators  
 43 often depends on the property of the applied graph [14]. We evaluate different aggregators and report  
 44 the best.

45 **Neighborhood Definition.** Following the principle of [14], to keep the computational footprint to  
 46 a minimum, we work on a fix-size sample set of node neighbors instead of the full neighborhood  
 47 nodes. Hence the notion of node neighbors  $Nr(v)$  is defined as a fix-size sample of the full node  
 48 neighborhood  $\{u \in V : (u, v) \in E\}$ . This sample is drawn uniformly at each iteration, thereby  
 49 reducing the time and memory complexity. With the sampling strategy, the memory and time  
 50 complexity per node aggregation step is fixed at  $\mathcal{O}(\prod_{m=1}^M S_m)$ , where  $S_m$  is the neighborhood  
 51 sample size at layer  $m$ , and  $M$  is the maximum layer considered (i.e., up to  $M$ -hop neighbors).

## 52 3 Dataset

53 In this project, each dataset contains the title and abstract of papers published in the biomedical fields.  
 54 To evaluate the model’s adaptivity in different scientific domains, we construct three graphs from  
 55 papers on *COVID-19*, *Immunotherapy*, and *Virology*.

56 The graph statistics are shown in Table 1 of the main paper. To set up the training and test-  
 57 ing data, we split the graph by a 10-year interval starting from 1949 (i.e.,  $\{\leq 1949\}, \{1950 -$   
 58  $1959\}, \dots, \{2010 - 2019\}$ ) for the virology and immunotherapy datasets. Due to the nov-  
 59 elty of the COVID-19 virus, we split the graph by a 5-year interval starting from 1995 (i.e.,  
 60  $\{\leq 1995\}, \{1995 - 2000\}, \dots, \{2010 - 2015\}$ ). We use year splits of  $\leq 2009$  ( $\{G^1, G^2, \dots, G^T\}$ )  
 61 for training, and the final split 2010 – 2019 for testing on the virology and immunotherapy datasets.

62 We use year splits of  $\leq 2015$  ( $\{G^1, G^2, \dots, G^5\}$ ) for training, and the final split 2015 – 2020 for  
63 testing on the COVID-19 datasets.

64 At each  $t$ , for a given node (a biomedical term), we extract its term description and context (sentences  
65 encompassing the term in literature). The term description and contexts are respectively converted  
66 to a 300-dimensional feature vector by applying the latent semantic analysis (LSI) method on the  
67 document-term matrix features. The missing term and context attributes are completed with zero  
68 vectors. At each time  $t$ , the context features are updated with the new information about them in  
69 discoveries, and publications.

## 70 4 Experimental Setup

### 71 4.1 Baselines in Experiments

72 We use node2vec [13] to learn the graph structure feature and concatenate it with the text attributes to  
73 obtain an enriched node representation. In our link prediction task, we concatenate the embeddings  
74 of each node pair together as the final features.

75 When conducting the baseline experiments, we reweight the unlabeled examples following the  
76 instructions from [11] for Elkan’s baseline. As for SAR-EM [5], SCAR-C [5], SCAR-KM2 [23],  
77 SCAR-TIcE [4], we randomly select 30 features from the embedding features, which are used to  
78 calculate propensity score. For other hyper-parameters, we follow the same setting as their paper.  
79 However, due to training SAR-EM model is very time-consuming, and the result is very unstable, we  
80 limit the expectation-maximization iteration to 10,30,300, and we finally select the best performance  
81 among them.

### 82 4.2 TRP Model

83 In all our experiments, we treat the graph to be undirected and set the hidden dimensions to  $d = 128$ .  
84 For each neural network-based model, we performed a grid search over the learning rate  $lr =$   
85  $\{1e^{-2}, 5e^{-3}, 1e^{-3}, 5e^{-2}\}$ , on the Virology and Immunotherapy datasets from 1944 to 1999, and  
86 from 1950 to 2010 for the COVID-19 dataset. The best parameters per model from the grid search are  
87 then used in all experiments. The TRP models are trained with a parameter set ( $d = 128, S_1 = 20$ , and  
88  $S_2 = 10$ ), where  $S_1, S_2$  are the neighborhood sample size for the one-hot and two-hop neighborhood  
89 aggregation respectively. We implement TRP on Python, using the Tensorflow library. Each GPU  
90 based experiment was conducted on an Nvidia 1080TI GPU. The code will be publicly available  
91 upon the acceptance of the work.

## 92 5 Evidence for Supporting the Discovered Pairs

93 In this section, we provide evidences supporting the connectivity prediction between COVID-19 and  
94 the terms in Table 3 of the main paper. Note that the cited reference papers as evidence here were not  
95 present in our training and testing graphs.

96 **Anti-bodies – COVID-19.** The relationship between antibodies and the COVID-19 is well known,  
97 and several articles have been published linking the two terms together. The relationship is mainly  
98 seen in articles about the research and development of vaccines.

99 **A549 cells – COVID-19.** There are several very recent studies on the effects of COVID-19 on the  
100 A549 cells. Specifically, the capacity of COVID-19 to infect and replicate in A549 cells [15, 6, 8].

101 **Mycoplasma – COVID-19.** Several articles studied the effects of coinfection of Mycoplasma and  
102 COVID-19 and their correlation [19, 12].

103 **White matter – COVID-19.** White matter is the parts of the brain that connect brain cells to each  
104 other. Brun et al. [7] studied and analyzed the effects of the COVID-19 virus on the neurological  
105 functions of the brain.

106 **Zinc – COVID-19.** The effect of zinc on common colds, mostly caused by rhinoviruses, has been  
107 studied. Although the novel coronavirus that causes COVID-19 is not the same type of coronavirus  
108 that causes common colds, several studies [9, 16] have been made on the effect of zinc supplements  
109 on COVID-19 virus.

110 **Tobacco – COVID-19.** Some researchers have studied and analyzed the effect of tobacco usage with  
111 COVID-19 [3, 24]. Another research is the Cotiana Project [20], which studies the potential use of  
112 tobacco for vaccine production.

113 **Macrophages – COVID-19.** Macrophages are a population of innate immune cells that sense  
114 and respond to microbial threats by producing inflammatory molecules that eliminate pathogens  
115 and promote tissue repair [17]. Several recent studies have shown the effects of Macrophages on  
116 COVID-19 [22, 17].

117 **Adaptive immunity – COVID-19.** Adaptive immunity is an immunity that occurs after exposure to  
118 an antigen either from a pathogen or a vaccination. Several works have studied the availability and  
119 duration of adaptive immunity after a patient has been exposed to the COVID-19 virus [21, 10].

## 120 References

- 121 [1] Mesh browser. URL <https://meshb.nlm.nih.gov/>.
- 122 [2] Download covid-19. URL <https://www.semanticscholar.org/cord19/download>.
- 123 [3] Tobacco and waterpipe use increases the risk of suffering from  
124 covid-19. URL [http://www.emro.who.int/tfi/know-the-truth/  
125 tobacco-and-waterpipe-users-are-at-increased-risk-of-covid-19-infection.html](http://www.emro.who.int/tfi/know-the-truth/tobacco-and-waterpipe-users-are-at-increased-risk-of-covid-19-infection.html).
- 126 [4] J. Bekker and J. Davis. Estimating the class prior in positive and unlabeled data through decision tree  
127 induction. In *Thirty-Second AAAI Conference on Artificial Intelligence*, 2018.
- 128 [5] J. Bekker, P. Robberechts, and J. Davis. Beyond the selected completely at random assumption for learning  
129 from positive and unlabeled data. In *Joint European Conference on Machine Learning and Knowledge  
130 Discovery in Databases*, pages 71–85. Springer, 2019.
- 131 [6] D. Blanco-Melo, B. E. Nilsson-Payant, W.-C. Liu, S. Uhl, D. Hoagland, R. Møller, T. X. Jordan, K. Oishi,  
132 M. Panis, D. Sachs, et al. Imbalanced host response to sars-cov-2 drives development of covid-19. *Cell*,  
133 2020.
- 134 [7] G. Brun, J.-F. Hak, S. Coze, E. Kaphan, J. Carvelli, N. Girard, and J.-P. Stellmann. Covid-19—white matter  
135 and globus pallidum lesions: Demyelination or small-vessel vasculitis? *Neurology-Neuroimmunology  
136 Neuroinflammation*, 7(4), 2020.
- 137 [8] V. Cagno. Sars-cov-2 cellular tropism. *The Lancet Microbe*, 1(1):e2–e3, 2020.
- 138 [9] R. Derwand and M. Scholz. Does zinc supplementation enhance the clinical efficacy of chloro-  
139 quine/hydroxychloroquine to win today's battle against covid-19? *Medical Hypotheses*, page 109815,  
140 2020.
- 141 [10] S. Q. Du and W. Yuan. Mathematical modeling of interaction between innate and adaptive immune  
142 responses in covid-19 and implications for viral pathogenesis. *Journal of Medical Virology*, 2020.
- 143 [11] C. Elkan and K. Noto. Learning classifiers from only positive and unlabeled data. In *Proceedings of the  
144 14th ACM SIGKDD international conference on Knowledge discovery and data mining*, pages 213–220,  
145 2008.
- 146 [12] B. E. Fan, K. G. E. Lim, V. C. L. Chong, S. S. W. Chan, K. H. Ong, and P. Kuperan. Covid-19 and  
147 mycoplasma pneumoniae coinfection. *American journal of hematology*, 2020.
- 148 [13] A. Grover and J. Leskovec. node2vec: Scalable feature learning for networks. In *Proceedings of the 22nd  
149 ACM SIGKDD international conference on Knowledge discovery and data mining*, pages 855–864, 2016.
- 150 [14] W. Hamilton, Z. Ying, and J. Leskovec. Inductive representation learning on large graphs. In *Advances in  
151 neural information processing systems*, pages 1024–1034, 2017.
- 152 [15] J. Harcourt, A. Tamin, X. Lu, S. Kamili, S. K. Sakhivel, L. Wang, J. Murray, K. Queen, B. Lynch,  
153 B. Whitaker, et al. Isolation and characterization of sars-cov-2 from the first us covid-19 patient. *BioRxiv*,  
154 2020.
- 155 [16] A. Kumar, Y. Kubota, M. Chernov, and H. Kasuya. Potential role of zinc supplementation in prophylaxis  
156 and treatment of covid-19. *Medical Hypotheses*, page 109848, 2020.

- 157 [17] M. Merad and J. C. Martin. Pathological inflammation in patients with covid-19: a key role for monocytes  
158 and macrophages. *Nature Reviews Immunology*, pages 1–8, 2020.
- 159 [18] NCBI. Ncbi resource coordinators. pubmed. URL <https://www.ncbi.nlm.nih.gov/pubmed/>.
- 160 [19] G. L. Nicolson, G. F. de Mattos, et al. COVID-19 Coronavirus: Is Infection along with Mycoplasma or  
161 Other Bacteria Linked to Progression to a Lethal Outcome? *International Journal of Clinical Medicine*, 11  
162 (05):282, 2020.
- 163 [20] D. Orzáez, D. Orzáez, and N. P. Coordinator. Powerful properties: how tobacco is be-  
164 ing used to fight covid-19, May 2020. URL [https://www.euronews.com/2020/05/25/  
165 powerful-properties-how-tobacco-is-being-used-to-fight-covid-19](https://www.euronews.com/2020/05/25/powerful-properties-how-tobacco-is-being-used-to-fight-covid-19).
- 166 [21] S. Pappas. After recovering from covid-19, are you immune?, May 2020. URL [https://www.  
167 livescience.com/covid-19-immunity.html](https://www.livescience.com/covid-19-immunity.html).
- 168 [22] M. D. Park. Macrophages: a trojan horse in covid-19?, 2020.
- 169 [23] H. Ramaswamy, C. Scott, and A. Tewari. Mixture proportion estimation via kernel embeddings of  
170 distributions. In *International Conference on Machine Learning*, pages 2052–2060, 2016.
- 171 [24] R. van ZylSmit, G. Richards, and F. Leone. Tobacco smoking and covid-19 infection. *The Lancet  
172 Respiratory Medicine*, 2020.
